# Supplementary material
Source: publisher figshare collection journal article supplement (https://tandf.figshare.com/ndownloader/files/14076128)
Supplement: Supplementary file 1 [file 14076128]

Supplemental material: Details of clinical, molecular and pathologic findings in Beckwith-Wiedemann syndrome cases.

| **Case** | **Maternal age** | | **Sex** | **Molecular**  **diagnostic** | **GA (weeks)** | **Type of pregnancy** | **Gestational outcome** | **Placentomegaly** | **Placental lesions** | | |  | |
| --- | --- | --- | --- | --- | --- | --- | --- | --- | --- | --- | --- | --- | --- |
|  |  |  | |  |  |  |  |  | **PMD** | **Chorangioma/**  **chorangiomatosis** | **EVT**  **cytomegaly** | |
| **1** | | 27 | F | | ICR2 LOM | 23 | S | TOP | yes | yes | yes | yes | |
| **2** | | 25 | F | | ICR2 LOM | 34 | S | LB | yes | no | no | no | |
| **3** | | 40 | M | | ICR2 LOM | 34 | S | LB | yes | no | yes | no | |
| **4** | | 35 | M | | ICR2 LOM | 40 | S | LB | yes | no | no | no | |
| **5** | | 36 | F | | ICR2 LOM | 37 | S | LB | yes | no | no | no | |
| **6** | | 31 | F | | ICR2 LOM | 33 | T | LB | NA | no | yes | no | |
| **7** | | 25 | F | | ICR2 LOM | 30 | S | LB | yes | no | no | yes | |
| **8** | | 29 | F | | ICR2 LOM | 33 | S | LB | yes | yes | no | yes | |
| **9** | | 27 | M | | ICR2 LOM | 34 | S | LB | no | no | yes | no | |
| **10** | | 26 | F | | ICR2 LOM | 33 | S | LB | yes | no | no | no | |
| **11** | | 30 | M | | ICR2 LOM | 18 | S | IUFD | no | no | no | no | |
| **12** | | 30 | M | | ICR2 LOM | 29 | T | LB | NA | no | no | no | |
| **13** | | 33 | F | | ICR2 LOM | 37 | S | LB | yes | no | no | no | |
| **14** | | 31 | F | | ICR2 LOM | 38 | S | LB | yes | yes | no | yes | |
| **15** | | 33 | M | | ICR2 LOM | 40 | S | TOP | no | no | yes | no | |
| **16** | | 23 | M | | ICR2 LOM | 37 | S | LB | yes | no | yes | yes | |
| **17** | | 19 | F | | ICR2 LOM | 34 | S | LB | yes | yes | yes | yes | |
| **18** | | 33 | F | | ICR2 LOM | 24 | S | TOP | no | no | no | no | |
| **19** | | 24 | M | | ICR2 LOM | 38 | S | LB | yes | no | no | yes | |
| **20** | | 21 | M | | ICR2 LOM | 27 | S | TOP | yes | yes | no | no | |
| **21** | | 29 | F | | ICR2 LOM | 40 | S | LB | no | no | no | no | |
| **22** | | 24 | M | | ICR2 LOM | 29 | S | NA | yes | no | no | no | |
| **23** | | NA | M | | ICR2 LOM | 33 | S | LB | no | no | no | no | |
| **24** | | 32 | F | | ICR2 LOM | 24 | S | LB | no | no | yes | no | |
| **25** | | 41 | F | | ICR2 LOM | 24 | S | LB | no | no | no | no | |
| **26** | | 24 | M | | ICR2 LOM | 39 | S | LB | yes | no | yes | yes | |
| **27** | | 25 | F | | ICR2 LOM | 36 | S | LB | yes | no | no | no | |
| **28** | | 27 | M | | ICR2 LOM | 25 | T | LB | NA | no | no | no | |
| **29** | | 25 | F | | ICR2 LOM | 33 | S | LB | yes | no | no | no | |
| **30** | | 30 | F | | ICR2 LOM | 35 | T | LB | NA | no | no | no | |
| **31** | | 37 | M | | ICR2 LOM | 26 | S | TOP | yes | no | no | yes | |
| **32** | | 42 | M | | ICR2 LOM | 33 | S | LB | no | no | no | no | |
| **33** | | 27 | F | | ICR2 LOM | 33 | S | LB | yes | no | no | yes | |
| **34** | | NA | F | | CDKN1C mutation | 16 | S | IUFD | yes | yes | no | yes | |
| **35** | | NA | M | | CDKN1C mutation | 31 | S | LB | yes | no | no | no | |
| **36** | | 38 | F | | CDKN1C mutation | 28 | S | TOP | no | yes | no | no | |
| **37** | | 26 | F | | CDKN1C mutation | 23 | S | TOP | no | no | no | no | |
| **38** | | 26 | NA | | CDKN1C mutation | 17 | S | TOP | no | no | no | no | |
| **39** | | 27 | M | | CDKN1C mutation | 12 | S | TOP | NA | no | no | no | |
| **40** | | 24 | F | | ICR1 GOM | 38 | S | LB | yes | no | no | no | |
| **41** | | 30 | M | | ICR1 GOM | 32 | S | TOP | yes | no | no | no | |
| **42** | | NA | F | | ICR1 GOM | 30 | S | TOP | no | no | no | no | |
| **43** | | NA | M | | ICR1 GOM | 29 | S | TOP | yes | no | no | no | |
| **44** | | NA | F | | ICR1 GOM | 38 | S | LB | yes | no | no | no | |
| **45** | | 31 | M | | ICR1 GOM | 37 | S | LB | yes | no | yes | no | |
| **46** | | 27 | F | | 11p15 pUPD | 36 | S | LB | yes | yes | yes | no | |
| **47** | | 28 | F | | 11p15 pUPD | 28 | S | LB | yes | yes | yes | no | |
| **48** | | 32 | F | | 11p15 pUPD | 37 | S | LB | no | no | no | no | |
| **49** | | 34 | F | | 11p15 pUPD | 22 | S | IUFD | yes | no | no | no | |
| **50** | | 31 | F | | 11p15 pUPD | 36 | S | LB | yes | no | no | no | |
| **51** | | NA | M | | 11p15 pUPD | 37 | S | TOP | no | no | no | no | |
| **52** | | 33 | F | | 11p15 pUPD | 27 | S | IUFD | yes | yes | yes | no | |
| **53** | | 26 | M | | 11p15 pUPD | 38 | S | LB | yes | no | no | no | |
| **54** | | 26 | M | | 46,XY,inv(11)  (p15q13)mat | 16 | S | TOP | yes | yes | no | no | |
| **55** | | 27 | F | | 46,XX,inv(11)  (p15q13)mat | 31 | S | LB | yes | no | yes | yes | |
| **56** | | 41 | M | | 46,XY,dup(11)  (p15.5p15.4) | 30 | S | LB | yes | no | no | no | |
| **57** | | 31 | M | | 46,XY,der(5)t(5;11)  (p15.3;p12)pat | 29 | S | TOP | yes | no | no | no | |
| **58** | | 19 | F | | 46,XX,der(18)t(11;18)  (p11.2;p11.32)dn | 28 | S | TOP | yes | no | no | no | |
| **59** | | 30 | M | | 46,XY,del(11)  (p14.p15.5)mat | 24 | S | TOP | no | yes | no | yes | |
| **60** | | 28 | M | | 46,XY,inv(11)(p15q13)mat | 15 | S | TOP | yes | yes | no | no | |

F: female; M: male; ICR2 LOM: Imprinting Center Region 2 loss of methylation; ICR1 GOM: Imprinting Center Region 1 gain of methylation; pUPD: paternal uniparental disomy; GA: gestational age; S: singleton; T: twin; LB: live birth; TOP: termination of pregnancy; IUFD: intrauterine foetal death; PMD: placental mesenchymal dysplasia; EVT: extravillous trophoblastic; NA: not available.
